# Supplementary material
Source: PubMed Central journal article supplement (PMC8767765)

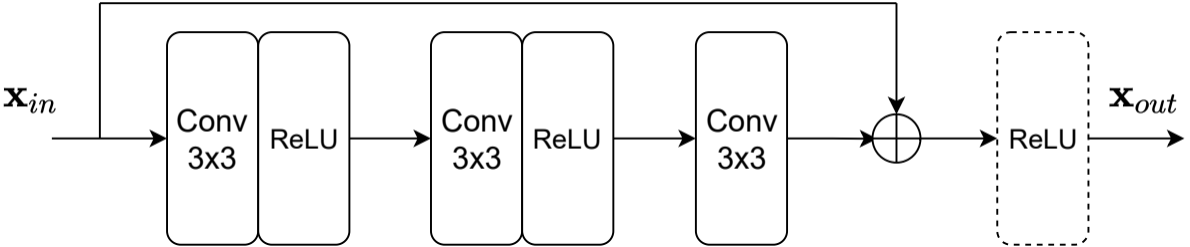

Supplement: NIHMS1765492-supplement-Fig_6.pdf [file NIHMS1765492-supplement-Fig_6.pdf]
